# Supplementary material
Source: PubMed Central journal article supplement (PMC3568332)
Supplement: 1219901110_pnas.201219901SI.pdf [file 1219901110_pnas.201219901SI.pdf]

# Supporting Information

Lu et al. 10.1073/pnas.1219901110

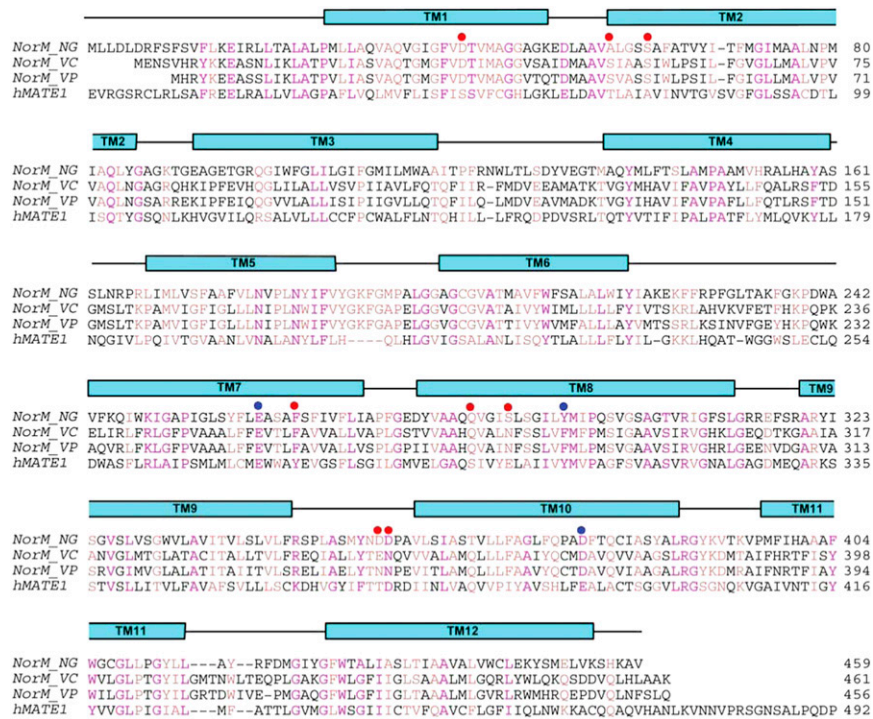

**Fig. S1.** Sequence alignment of Na<sup>+</sup>-coupled multidrug and toxic compound extrusion (MATE) transporter (NorM)-NG with NorM-VC, NorM-VP, and hMATE1. Conserved and homologous residues are colored magenta and rose, respectively. Regions of transmembrane helices in NorM-NG are outlined according to dihedral angles ( $\phi$  and  $\psi$ ) and numbered. Blue and red dots indicate amino acids that coordinate Na<sup>+</sup> and interact with all three substrates, respectively. Residues 1–19 in hMATE1 are omitted for clarity.

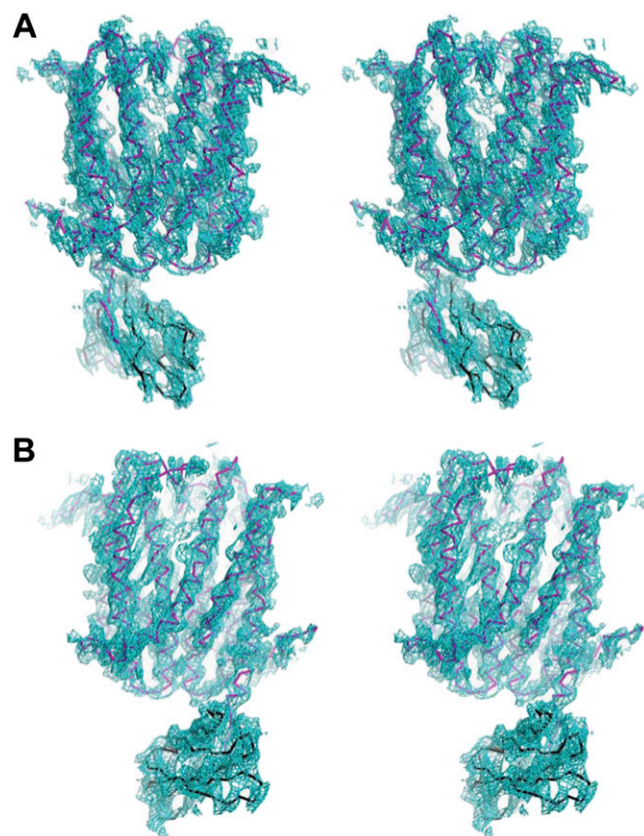

**Fig. S2.** Stereo views of the experimental electron density for the apo crystal form. The map was calculated to 3.5-Å resolution using density modified multiple isomorphous replacement and anomalous scattering (MIRAS) phases and contoured at  $1.5\sigma$ . Density modification included solvent flattening, histogram matching, cross-crystal averaging, and phase extension. The  $C\alpha$  backbone of NorM-NG is colored magenta, whereas that of monobody is in black. The view in *A* is related to that in *B* by an  $180^\circ$  rotation along the membrane normal.

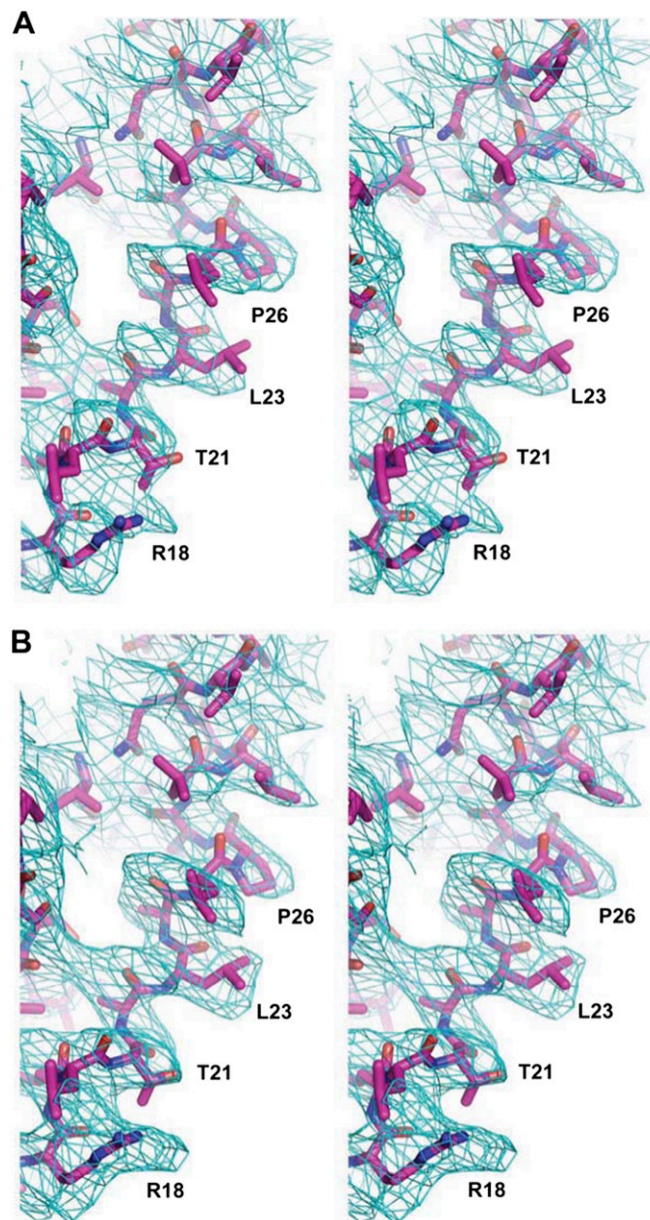

**Fig. S3.** Stereo views of representative electron density at 3.5-Å resolution for the apo crystal form. The featured slice depicts the amino end of TM1. Density modified MIRAS phases were used to calculate map shown in *A*, whereas the MIRAS phases were combined with model-derived phases before density modification to yield map in *B*. Both maps were contoured at  $1\sigma$ .

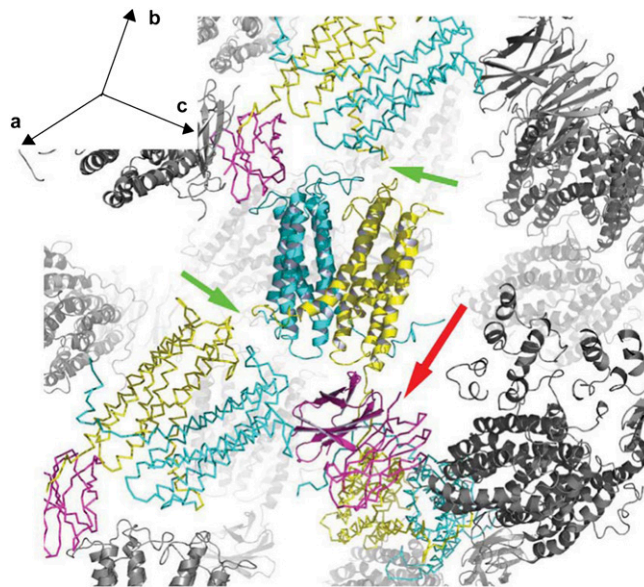

**Fig. 54.** Crystal packing in the apo crystal form. One complex of NorM-NG and monobody is drawn as ribbons, whereas its three neighboring complexes are displayed as backbone traces. NorM-NG is colored cyan (residues 5–230) and yellow (residues 231–459), whereas monobody is in magenta. Other molecules are shown as black ribbons. Red arrow highlights the extensive interactions mediated by monobody alone; green arrows indicate the packing interactions between adjacent NorM-NG molecules, which seem to stabilize the drug-bound conformation. *Inset* indicates the directions of unit cell axes.



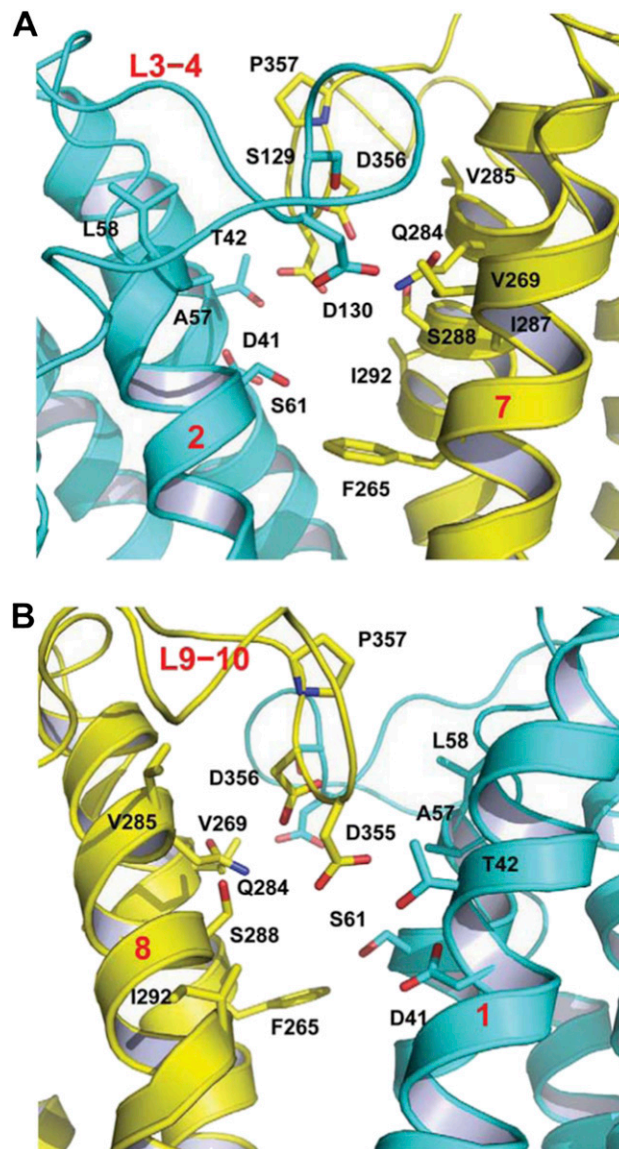

**Fig. 55.** Central cavity as viewed from the membrane plane. Views in *A* and *B* are related by a 180° rotation along the membrane normal. NorM-NG in ribbon rendition is colored cyan (residues 5–230) and yellow (residues 231–459). Amino acids within the cavity are drawn as stick models.





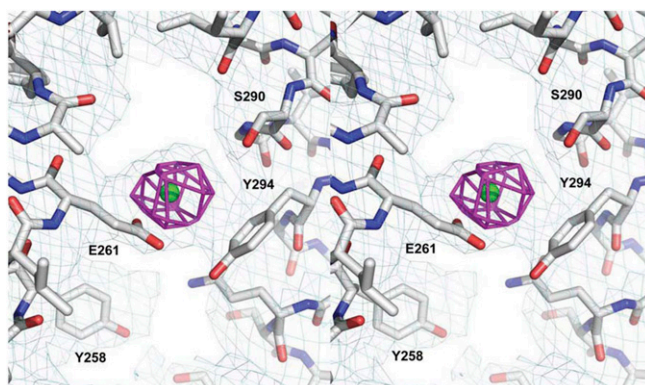

**Fig. S8.** Stereoview of the electron density for the  $\text{Cs}^+$ -binding site in NorM-NG. TM7 and TM8 are shown in stick representation, whereas  $\text{Cs}^+$  is displayed as a green sphere. The  $2\text{Fo}-\text{Fc}$  electron density map (light blue wire) was calculated to 3.8 Å and contoured at  $1\sigma$ , whereas the difference isomorphous Fourier map (magenta mesh) was calculated to 6 Å and contoured at  $6\sigma$ . Notably, the counterparts of E261 and Y258 in NorM-VC were among the nine amino acids that had been implicated in cation binding (1).

1. He X, et al. (2010) Structure of a cation-bound multidrug and toxic compound extrusion transporter. *Nature* 467(7318):991–994.

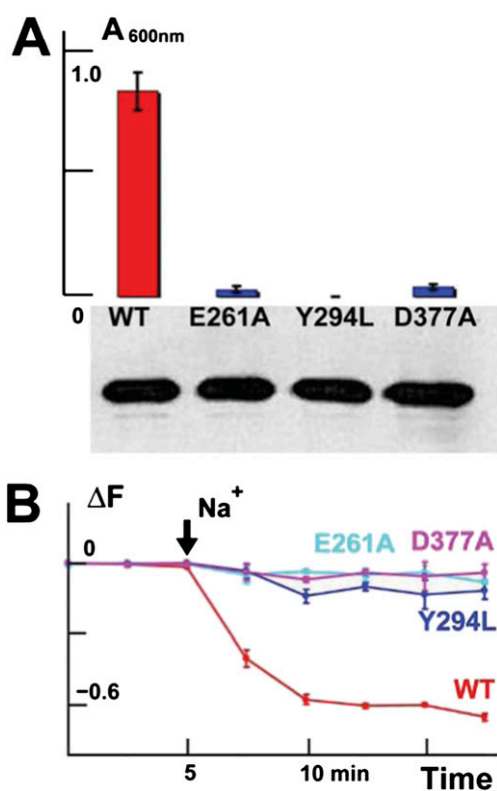

**Fig. S9.** Functional consequences of mutations in the cation-binding site. (A) The inhibition of bacterial growth as measured by attenuation at 600 nm ( $A_{600\text{nm}}$ ). Bacteria expressing the indicated NorM-NG mutants were grown in the presence of 3.0  $\mu\text{g}/\text{mL}$  R6G. (Inset) Western blot analysis of NorM-NG mutants in membrane preparations. (B) Time course of fractional fluorescence reduction ( $\Delta F$ ) as a result of whole cell-based R6G efflux mediated by NorM-NG mutants. Reactions were started by the addition of 200 mM NaCl, as indicated by black arrows. In both A and B, error bars show SDs among three independent experiments that were conducted in duplicate.



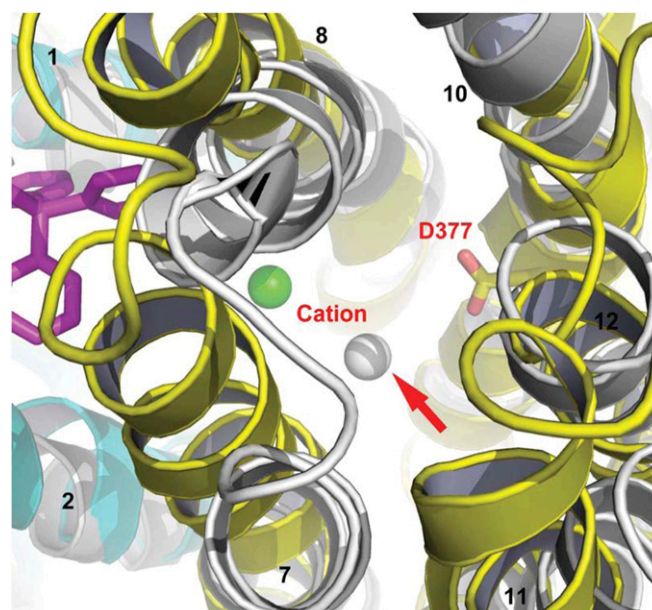

**Fig. S10.**  $\text{Na}^+$  coordination in the substrate-free transporter likely involves D377. Cation-bound NorM-NG (cyan and yellow, PDB ID code 4HUL) and NorM-VC (gray, PDB ID code 3MKU) are shown as ribbon diagrams; TPP (magenta) and D377 in NorM-NG are drawn as stick models. TPP model was taken from the drug-bound structure (PDB ID code 4HUK) to indicate the substrate-binding site. Cations bound to NorM-NG and NorM-VC are depicted as green and gray sphere, respectively. Structural superimposition of NorM-NG and NorM-VC placed the bound cation from NorM-VC (highlighted by a red arrow) in close proximity to D377, supporting the direct involvement of D377 in cation-coordination in the drug-free,  $\text{Na}^+$ -bound transporter (state 3 in Fig. 4).

**Table S1. Data collection and phasing statistics for apo NorM-NG**

|                                            | Native                       | EMTS                         | TMLA                         | TELA                         | $\text{K}_2\text{PtCl}_4$    | $\text{KAu}(\text{CN})_2$    | TMLA +<br>$\text{K}_2\text{PtCl}_4$ | $\text{KAu}(\text{CN})_2$ +<br>$\text{K}_2\text{PtCl}_4$ | CsCl                       |
|--------------------------------------------|------------------------------|------------------------------|------------------------------|------------------------------|------------------------------|------------------------------|-------------------------------------|----------------------------------------------------------|----------------------------|
| Wavelength (Å)                             | 1.00                         | 0.979                        | 0.979                        | 0.979                        | 0.979                        | 1.00                         | 1.00                                | 1.02                                                     | 1.05                       |
| Space group                                | $\text{P3}_221$                     | $\text{P3}_221$                                          | $\text{P3}_221$            |
| <i>a</i> , <i>b</i> , <i>c</i> (Å)         | 118.21,<br>118.12,<br>226.59 | 119.13,<br>119.13,<br>226.61 | 117.75,<br>117.75,<br>227.18 | 117.67,<br>117.67,<br>227.20 | 118.68,<br>118.68,<br>228.76 | 117.98,<br>117.98,<br>226.84 | 118.45,<br>118.45,<br>227.96        | 119.40,<br>119.40,<br>228.04                             | 118.3,<br>118.3,<br>227.32 |
| Resolution (Å)                             | 60–3.50                      | 60–4.50                      | 60–4.00                      | 60–4.00                      | 60–5.00                      | 60–4.00                      | 60–6.00                             | 60–4.00                                                  | 60–3.80                    |
| Observations                               | 307,944                      | 148,887                      | 232,598                      | 270,163                      | 105,942                      | 203,806                      | 68,602                              | 235,427                                                  | 149,127                    |
| Unique reflections                         | 23,025                       | 11,540                       | 15,977                       | 15,891                       | 10,846                       | 15,692                       | 4,984                               | 16,221                                                   | 18,316                     |
| Completeness (last shell)                  | 98.6%<br>(86.2%)             | 99.9%<br>(100%)              | 99.9%<br>(100%)              | 98.4%<br>(88.5%)             | 94.8% (74.5%)                | 98.4%<br>(95.3%)             | 98.9%<br>(98.7%)                    | 99.2%<br>(99.5%)                                         | 98.3%<br>(93.3%)           |
| $R_{\text{sym}}$ (last shell)*             | 11.0%<br>(60.2%)             | 13.2%<br>(58.7%)             | 10.7%<br>(92.8%)             | 12.8%<br>(98.7%)             | 12.2% (77.0%)                | 13.3%<br>(94.0%)             | 8.4% (92.5%)                        | 10.0%<br>(76.3%)                                         | 11.8%<br>(67.8%)           |
| $I/\sigma$ (last shell)                    | 30.9 (1.5)                   | 28.5 (2.5)                   | 29.9 (2.2)                   | 24.4 (1.0)                   | 26.0 (0.8)                   | 22.6 (1.3)                   | 44.0 (2.1)                          | 30.4 (1.9)                                               | 15.1 (1.3)                 |
| Phasing power (iso/ano) <sup>†</sup>       | NA                           | 1.28/0.61                    | 2.00/0.72                    | 1.82/NA                      | 1.01/NA                      | 1.79/NA                      | 0.94/NA                             | 0.93/NA                                                  | NA                         |
| $R_{\text{cullis}}$ (iso/ano) <sup>‡</sup> | NA                           | 0.69/0.98                    | 0.50/0.98                    | 0.58/NA                      | 0.93/NA                      | 0.55/NA                      | 0.83/NA                             | 0.63/NA                                                  | NA                         |

Overall MIRAS figure of merit (defined as weighted mean value of the cosine of phase error; 20–4.0 Å): 0.69 (acentric), 0.72 (centric). EMTS, thimerosal; NA, not applicable; TELA, triethyllead acetate; TMLA, trimethyllead acetate.

\* $R_{\text{sym}} = \sum |I - \langle I \rangle| / \sum I$ , where *I* is the observed intensity of symmetry-related reflections.

<sup>†</sup>Phasing power =  $F_h/E$ , where  $F_h$  is the rms isomorphous/anomalous difference and *E* the rms residual lack of closure.

<sup>‡</sup> $R_{\text{cullis}}(\text{iso}) = \Sigma (|F_{\text{PH}} - F_{\text{P}}| - |F_{\text{H}}(\text{calc})|) / \Sigma (|F_{\text{PH}} - F_{\text{P}}|)$ , where  $F_{\text{PH}}$  and  $F_{\text{P}}$  are structure factors for derivative and native data, respectively.  $R_{\text{cullis}}(\text{iso})$  is valid for centric reflections only.  $R_{\text{cullis}}(\text{ano}) = \Sigma (|\Delta F_{\text{PH}}(\text{obs})| - |\Delta F_{\text{PH}}(\text{calc})|) / \Sigma |\Delta F_{\text{PH}}(\text{obs})|$ , where  $\Delta F_{\text{PH}}(\text{obs})$  and  $\Delta F_{\text{PH}}(\text{calc})$  are the observed and calculated structure factor differences between Bijvoet pairs, respectively.

**Table S2. Data collection and phasing statistics for ethidium-bound NorM-NG**

|                                            | Native                 | EMTS                   | TMLA                   | TELA                   | K <sub>2</sub> PtCl <sub>4</sub> |
|--------------------------------------------|------------------------|------------------------|------------------------|------------------------|----------------------------------|
| Wavelength (Å)                             | 1.03                   | 1.03                   | 1.03                   | 1.03                   | 1.03                             |
| Space group                                | P3 <sub>2</sub> 21               |
| a, b, c (Å)                                | 119.03, 119.03, 227.48 | 116.41, 116.41, 224.99 | 117.66, 117.66, 226.29 | 117.91, 117.91, 226.88 | 116.94, 116.94, 227.97           |
| Resolution (Å)                             | 60–3.50                | 60–4.00                | 60–3.60                | 60–4.00                | 60–4.50                          |
| Observations                               | 591,089                | 249,097                | 350,297                | 144,870                | 190,201                          |
| Unique reflections                         | 24,111                 | 15,190                 | 21,803                 | 16,104                 | 10,979                           |
| Completeness (last shell)                  | 98.9% (85.3%)          | 99.6% (100%)           | 99.1% (92.0%)          | 98.7% (96.3%)          | 99.2% (98.9%)                    |
| R <sub>sym</sub> (last shell)*             | 11.0% (62.6%)          | 13.9% (74.7%)          | 13.1% (62.1%)          | 11.9% (62.9%)          | 11.7% (58.7%)                    |
| //σ (last shell)                           | 37.7 (1.5)             | 35.3 (2.9)             | 27.5 (1.7)             | 20.8 (1.7)             | 43.6 (3.1)                       |
| Phasing power (iso/ano) <sup>†</sup>       | N.A.                   | 1.17/0.49              | 1.23/0.45              | 1.13/0.47              | 1.01/0.44                        |
| R <sub>cullis</sub> (iso/ano) <sup>‡</sup> | N.A.                   | 0.76/0.96              | 0.78/0.97              | 0.81/0.99              | 0.81/0.96                        |

Overall MIRAS figure of merit (defined as weighted mean value of the cosine of phase error; 20–3.60 Å): 0.37 (acentric), 0.45 (centric). EMTS, thimerosal; NA, not applicable; TELA, triethyllead acetate; TMLA, trimethyllead acetate.

\*R<sub>sym</sub> =  $\sum |I - \langle I \rangle| / \sum I$ , where  $I$  is the observed intensity of symmetry-related reflections.

<sup>†</sup>Phasing power =  $F_n/E$ , where  $F_n$  is the rms isomorphous/anomalous difference and  $E$  the rms residual lack of closure.

<sup>‡</sup>R<sub>cullis</sub>(iso) =  $\sum (|FPH - FP| - |FH(calc)|) / \sum (|FPH - FP|)$ , where FPH and FP are structure factors for derivative and native data, respectively. R<sub>cullis</sub>(iso) is valid for centric reflections only. R<sub>cullis</sub>(ano) =  $\sum (|\Delta FPH(obs)| - |\Delta FPH(calc)|) / \sum |\Delta FPH(obs)|$ , where  $\Delta FPH(obs)$  and  $\Delta FPH(calc)$  are the observed and calculated structure factor differences between Bijvoet pairs, respectively.

**Table S3. Data collection and phasing statistics for R6G-bound NorM-NG**

|                                            | Native                 | EMTS                   | TMLA                   | TELA                   | K <sub>2</sub> PtCl <sub>4</sub> |
|--------------------------------------------|------------------------|------------------------|------------------------|------------------------|----------------------------------|
| Wavelength (Å)                             | 1.03                   | 1.03                   | 0.939                  | 0.939                  | 1.03                             |
| Space group                                | P3 <sub>2</sub> 21               |
| a, b, c (Å)                                | 117.23, 117.23, 226.22 | 119.56, 119.56, 226.38 | 118.95, 118.95, 227.19 | 117.35, 117.35, 227.49 | 116.99, 116.99, 226.24           |
| Resolution (Å)                             | 60–3.60                | 60–4.00                | 60–4.00                | 60–4.00                | 60–5.00                          |
| Observations                               | 503,078                | 177,389                | 272,323                | 227,942                | 82,064                           |
| Unique reflections                         | 21,652                 | 15,920                 | 16,095                 | 15,965                 | 8,121                            |
| Completeness (last shell)                  | 99.5% (99.7%)          | 98.9% (96.9%)          | 99.2% (99.7%)          | 99.5% (99.0%)          | 99.0% (100.0%)                   |
| R <sub>sym</sub> (last shell)*             | 11.9% (68.4%)          | 12.6% (68.1%)          | 11.8% (71.3%)          | 12.8% (70.5%)          | 11.3% (63.2%)                    |
| //σ (last shell)                           | 36.0 (2.9)             | 31.6 (1.9)             | 31.4 (2.7)             | 22.6 (1.9)             | 40.5 (3.4)                       |
| Phasing power (iso/ano) <sup>†</sup>       | NA                     | 0.75/NA                | 1.22/0.46              | 1.26/0.47              | 1.08/0.38                        |
| R <sub>cullis</sub> (iso/ano) <sup>‡</sup> | NA                     | 0.93/NA                | 0.71/0.95              | 0.71/0.96              | 0.78/0.98                        |

Overall MIRAS figure of merit (defined as weighted mean value of the cosine of phase error; 20–4.00 Å): 0.48 (acentric), 0.52 (centric). EMTS, thimerosal; NA, not applicable; TELA, triethyllead acetate; TMLA, trimethyllead acetate.

\*R<sub>sym</sub> =  $\sum |I - \langle I \rangle| / \sum I$ , where  $I$  is the observed intensity of symmetry-related reflections.

<sup>†</sup>Phasing power =  $F_n/E$ , where  $F_n$  is the rms isomorphous/anomalous difference and  $E$  the rms residual lack of closure.

<sup>‡</sup>R<sub>cullis</sub>(iso) =  $\sum (|FPH - FP| - |FH(calc)|) / \sum (|FPH - FP|)$ , where FPH and FP are structure factors for derivative and native data, respectively. R<sub>cullis</sub>(iso) is valid for centric reflections only. R<sub>cullis</sub>(ano) =  $\sum (|\Delta FPH(obs)| - |\Delta FPH(calc)|) / \sum |\Delta FPH(obs)|$ , where  $\Delta FPH(obs)$  and  $\Delta FPH(calc)$  are the observed and calculated structure factor differences between Bijvoet pairs, respectively.

**Table S4. Data collection and phasing statistics for TPP-bound NorM-NG**

|                                                   | Native                       | EMTS                         | TMLA                         | TELA                         | K <sub>2</sub> PtCl <sub>4</sub> | TPA                          |
|---------------------------------------------------|------------------------------|------------------------------|------------------------------|------------------------------|----------------------------------|------------------------------|
| Wavelength (Å)                                    | 1.03                         | 1.03                         | 1.03                         | 1.03                         | 1.03                             | 1.04                         |
| Space group                                       | P3 <sub>2</sub> 21               | P3 <sub>2</sub> 21           |
| <i>a</i> , <i>b</i> , <i>c</i> (Å)                | 118.34,<br>118.34,<br>226.47 | 120.15,<br>120.15,<br>227.95 | 118.21,<br>118.21,<br>226.98 | 118.12,<br>118.12,<br>227.88 | 117.54,<br>117.54,<br>227.25     | 118.77,<br>118.77,<br>226.75 |
| Resolution (Å)                                    | 60–3.60                      | 60–3.60                      | 60–3.80                      | 60–4.00                      | 60–4.50                          | 60–4.50                      |
| Observations                                      | 795,483                      | 274,600                      | 221,897                      | 110,497                      | 53,845                           | 161,718                      |
| Unique reflections                                | 21,726                       | 21,082                       | 18,360                       | 14,586                       | 10,950                           | 11,481                       |
| Completeness (last shell)                         | 99.6% (100.0%)               | 98.5% (95.2%)                | 99.0% (98.6%)                | 92.3% (75.5%)                | 97.5% (91.4%)                    | 99.6% (100.0%)               |
| <i>R</i> <sub>sym</sub> (last shell)*             | 10.7% (75.5%)                | 11.4% (67.1%)                | 12.8% (64.0%)                | 12.9% (57.1%)                | 11.2% (62.4%)                    | 8.4% (70.7%)                 |
| <i>I</i> / <i>σ</i> (last shell)                  | 59.3 (4.7)                   | 36.2 (1.6)                   | 28.5 (2.3)                   | 20.0 (1.3)                   | 17.1 (1.3)                       | 38.7 (4.1)                   |
| Phasing power (iso/ano) <sup>†</sup>              | NA                           | 0.95/NA                      | 1.30/NA                      | 1.27/0.51                    | 1.06/0.46                        | NA                           |
| <i>R</i> <sub>cullis</sub> (iso/ano) <sup>‡</sup> | NA                           | 0.89/NA                      | 0.81/NA                      | 0.82/0.98                    | 0.83/0.98                        | NA                           |

Overall MIRAS figure of merit (defined as weighted mean value of the cosine of phase error; 20–3.60 Å): 0.35 (acentric), 0.46 (centric). EMTS, thimerosal; NA, not applicable; TELA, triethyllead acetate; TMLA, trimethyllead acetate; TPA, tetraphenyl-arsonium (substrate analog).

\**R*<sub>sym</sub> = Σ|| − <*I*>/Σ*I*, where *I* is the observed intensity of symmetry-related reflections.

<sup>†</sup>Phasing power = *F<sub>i</sub>*/*E*, where *F<sub>i</sub>* is the rms isomorphous/anomalous difference and *E* the rms residual lack of closure.

<sup>‡</sup>*R*<sub>cullis</sub>(iso) = Σ(|FPH − FP| − |FH(calc)|)/Σ(|FPH − FP|), where FPH and FP are structure factors for derivative and native data, respectively. *R*<sub>cullis</sub>(iso) is valid for centric reflections only. *R*<sub>cullis</sub>(ano) = Σ(|ΔFPH(obs)| − |ΔFPH(calc)|)/Σ|ΔFPH(obs)|, where ΔFPH(obs) and ΔFPH(calc) are the observed and calculated structure factor differences between Bijvoet pairs, respectively.

**Table S5. Structure refinement statistics**

|                                       | apo       | ethidium | R6G     | TPP     | CsCl    |
|---------------------------------------|-----------|----------|---------|---------|---------|
| Resolution (Å)                        | 20.0–3.50 | 20–3.50  | 20–3.60 | 20–3.60 | 20–3.80 |
| Number of reflections                 | 21,935    | 22,889   | 20,561  | 20,600  | 17,371  |
| <i>R</i> <sub>cryst</sub> *           | 33.82%    | 31.41%   | 30.59%  | 30.68%  | 31.08%  |
| <i>R</i> <sub>free</sub> <sup>†</sup> | 35.12%    | 33.13%   | 32.74%  | 34.94%  | 37.55%  |
| Number of atoms                       | 4,215     | 4,239    | 4,248   | 4,240   | 4,216   |
| < <i>B</i> >                          | 196.83    | 194.93   | 178.25  | 200.54  | 159.78  |
| rms deviation                         |           |          |         |         |         |
| Bond length (Å)                       | 0.017     | 0.013    | 0.015   | 0.013   | 0.018   |
| Bond angle                            | 2.24°     | 2.13°    | 2.33°   | 2.15°   | 2.34°   |
| Ramachandran                          |           |          |         |         |         |
| Favored                               | 94.1%     | 93.7%    | 92.3%   | 91.8%   | 93.0%   |
| Allowed                               | 5.9%      | 5.9%     | 6.6%    | 7.6%    | 5.9%    |
| Disallowed                            | 0%        | 0.4%     | 1.1%    | 0.6%    | 1.1%    |

\**R*<sub>cryst</sub> = Σ(|*F*<sub>obs</sub> − |*F*<sub>calc</sub>||)/Σ(|*F*<sub>obs</sub>|), where *F*<sub>obs</sub> and *F*<sub>calc</sub> are the observed and calculated structure factors, respectively.

<sup>†</sup>*R*<sub>free</sub> is the same as *R*<sub>cryst</sub> but calculated with 5% of the reflections excluded from structure refinement.

**Table S6. Well-resolved NorM-NG residues and the basis of their assignment**

| Residue | Assignment basis   |
|---------|--------------------|
| F8      | Side chain density |
| F10     | Side chain density |
| K15     | Au binding         |
| F39     | Side chain density |
| M44     | Pt binding         |
| F63     | Side chain density |
| Y67     | Side chain density |
| F70     | Side chain density |
| M71     | Pt binding         |
| M74     | Pt binding         |
| M80     | Pt binding         |
| Y85     | Side chain density |
| K89     | Au binding         |
| F110    | Side chain density |
| W116    | Side chain density |
| W125    | Side chain density |
| E133    | Pb binding         |
| H153    | Au binding         |
| H157    | Au binding         |
| Y159    | Side chain density |
| M170    | Pt binding         |
| Y185    | Side chain density |
| Y187    | Side chain density |
| F192    | Side chain density |
| C202    | Hg/Pb binding      |
| F210    | Side chain density |
| W211    | Side chain density |
| F212    | Side chain density |
| W218    | Side chain density |
| Y220    | Side chain density |
| F226    | Side chain density |
| F236    | Side chain density |
| W241    | Side chain density |
| W248    | Side chain density |
| Y258    | Side chain density |
| F259    | Side chain density |
| E261    | Pb binding         |
| F265    | Side chain density |
| Y294    | Side chain density |
| F310    | Side chain density |
| F317    | Side chain density |
| W332    | Side chain density |
| F345    | Side chain density |
| Y353    | Side chain density |
| D377    | Pb binding         |
| C381    | Hg/Pb binding      |
| K394    | Au binding         |
| H400    | Au binding         |
| C407    | Hg/Pb binding      |
| Y417    | Side chain density |
| F419    | Side chain density |
| C444    | Hg/Pb/Au binding   |
| Y448    | Side chain density |
| M450    | Pt binding         |
| H456    | Au binding         |
| K457    | Au binding         |

**Table S7. MIC ( $\mu\text{g}/\text{mL}$ ) of cells expressing NorM-NG variants**

| Drug     | pET15b | WT  | D41A | F265L | Q284A | D355A | D356A | S61A | E261A | Y294L | D377A |
|----------|--------|-----|------|-------|-------|-------|-------|------|-------|-------|-------|
| Ethidium | 0.5    | 2.0 | 0.5  | 0.5   | 0.5   | 0.5   | 0.5   | 2.0  | 0.5   | 0.5   | 0.5   |
| R6G      | 3.0    | 6.0 | 3.0  | 3.0   | 3.0   | 3.0   | 3.0   | 6.0  | 3.0   | 3.0   | 3.0   |
| TPP      | 2.5    | 5.0 | 2.5  | 2.5   | 2.5   | 2.5   | 2.5   | 5.0  | 2.5   | 2.5   | 2.5   |

F265A, S288A, or Y294A completely abolished NorM-NG expression. The following drug concentrations were used: 0, 0.5, 1.0, 1.5, 2.0, 2.5, and 3.0  $\mu\text{g}/\text{mL}$  ethidium; 0, 1.5, 3.0, 4.5, 6.0, 7.5, and 9.0  $\mu\text{g}/\text{mL}$  R6G; and 0, 1.25, 2.5, 3.75, 5.0, 6.25, and 7.5  $\mu\text{g}/\text{mL}$  TPP. MIC, minimal inhibitory concentration.
